# Supplementary material for: The anti-genomic (negative) strand of Hepatitis C Virus is not targetable by shRNA
Source: PubMed Central journal article supplement — Nucleic Acids Res. 2013 Feb 8;41(6):3688–98. doi: 10.1093/nar/gkt068 (PMC3616702; doi:10.1093/nar/gkt068), 2013-02-08
Supplement: supp_gkt068_nar-03141-y-2012-File004.pdf [file supp_gkt068_nar-03141-y-2012-File004.pdf]

A.

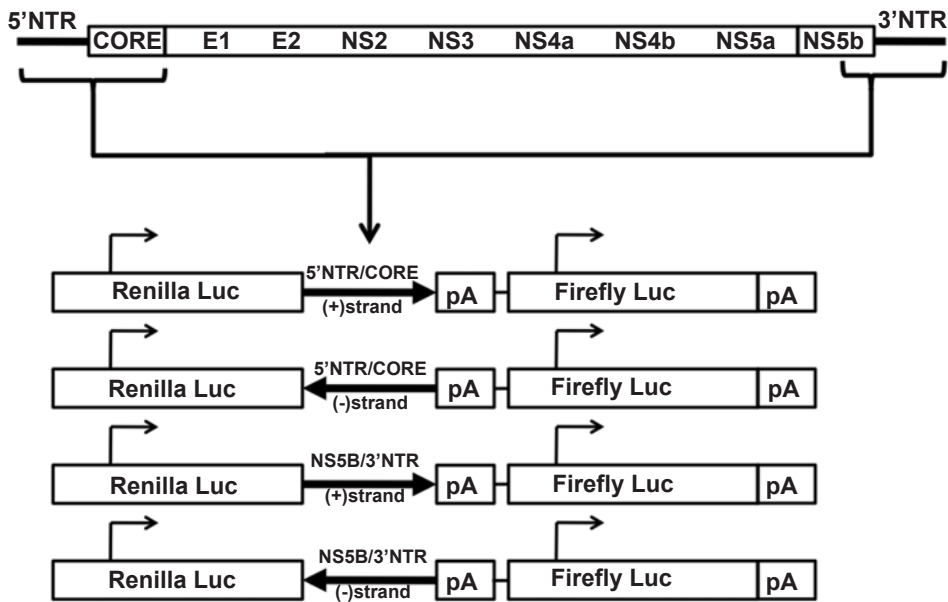

B.

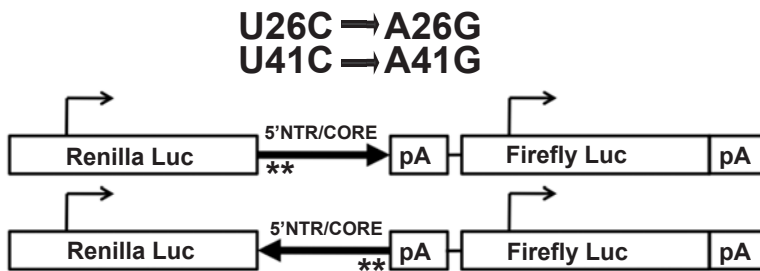

C.

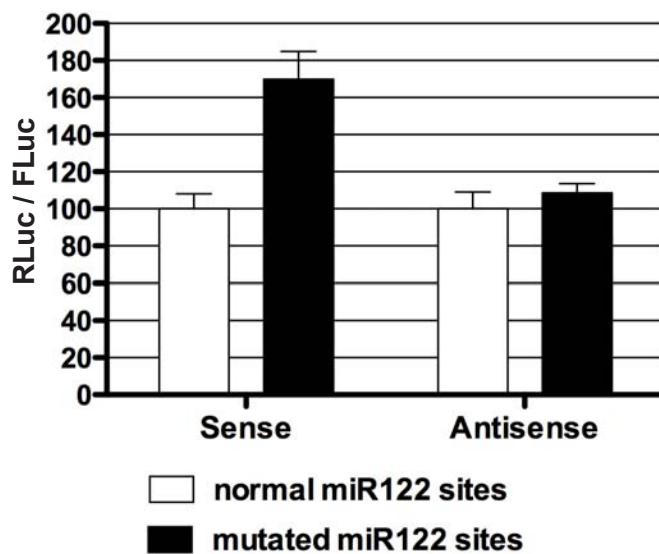

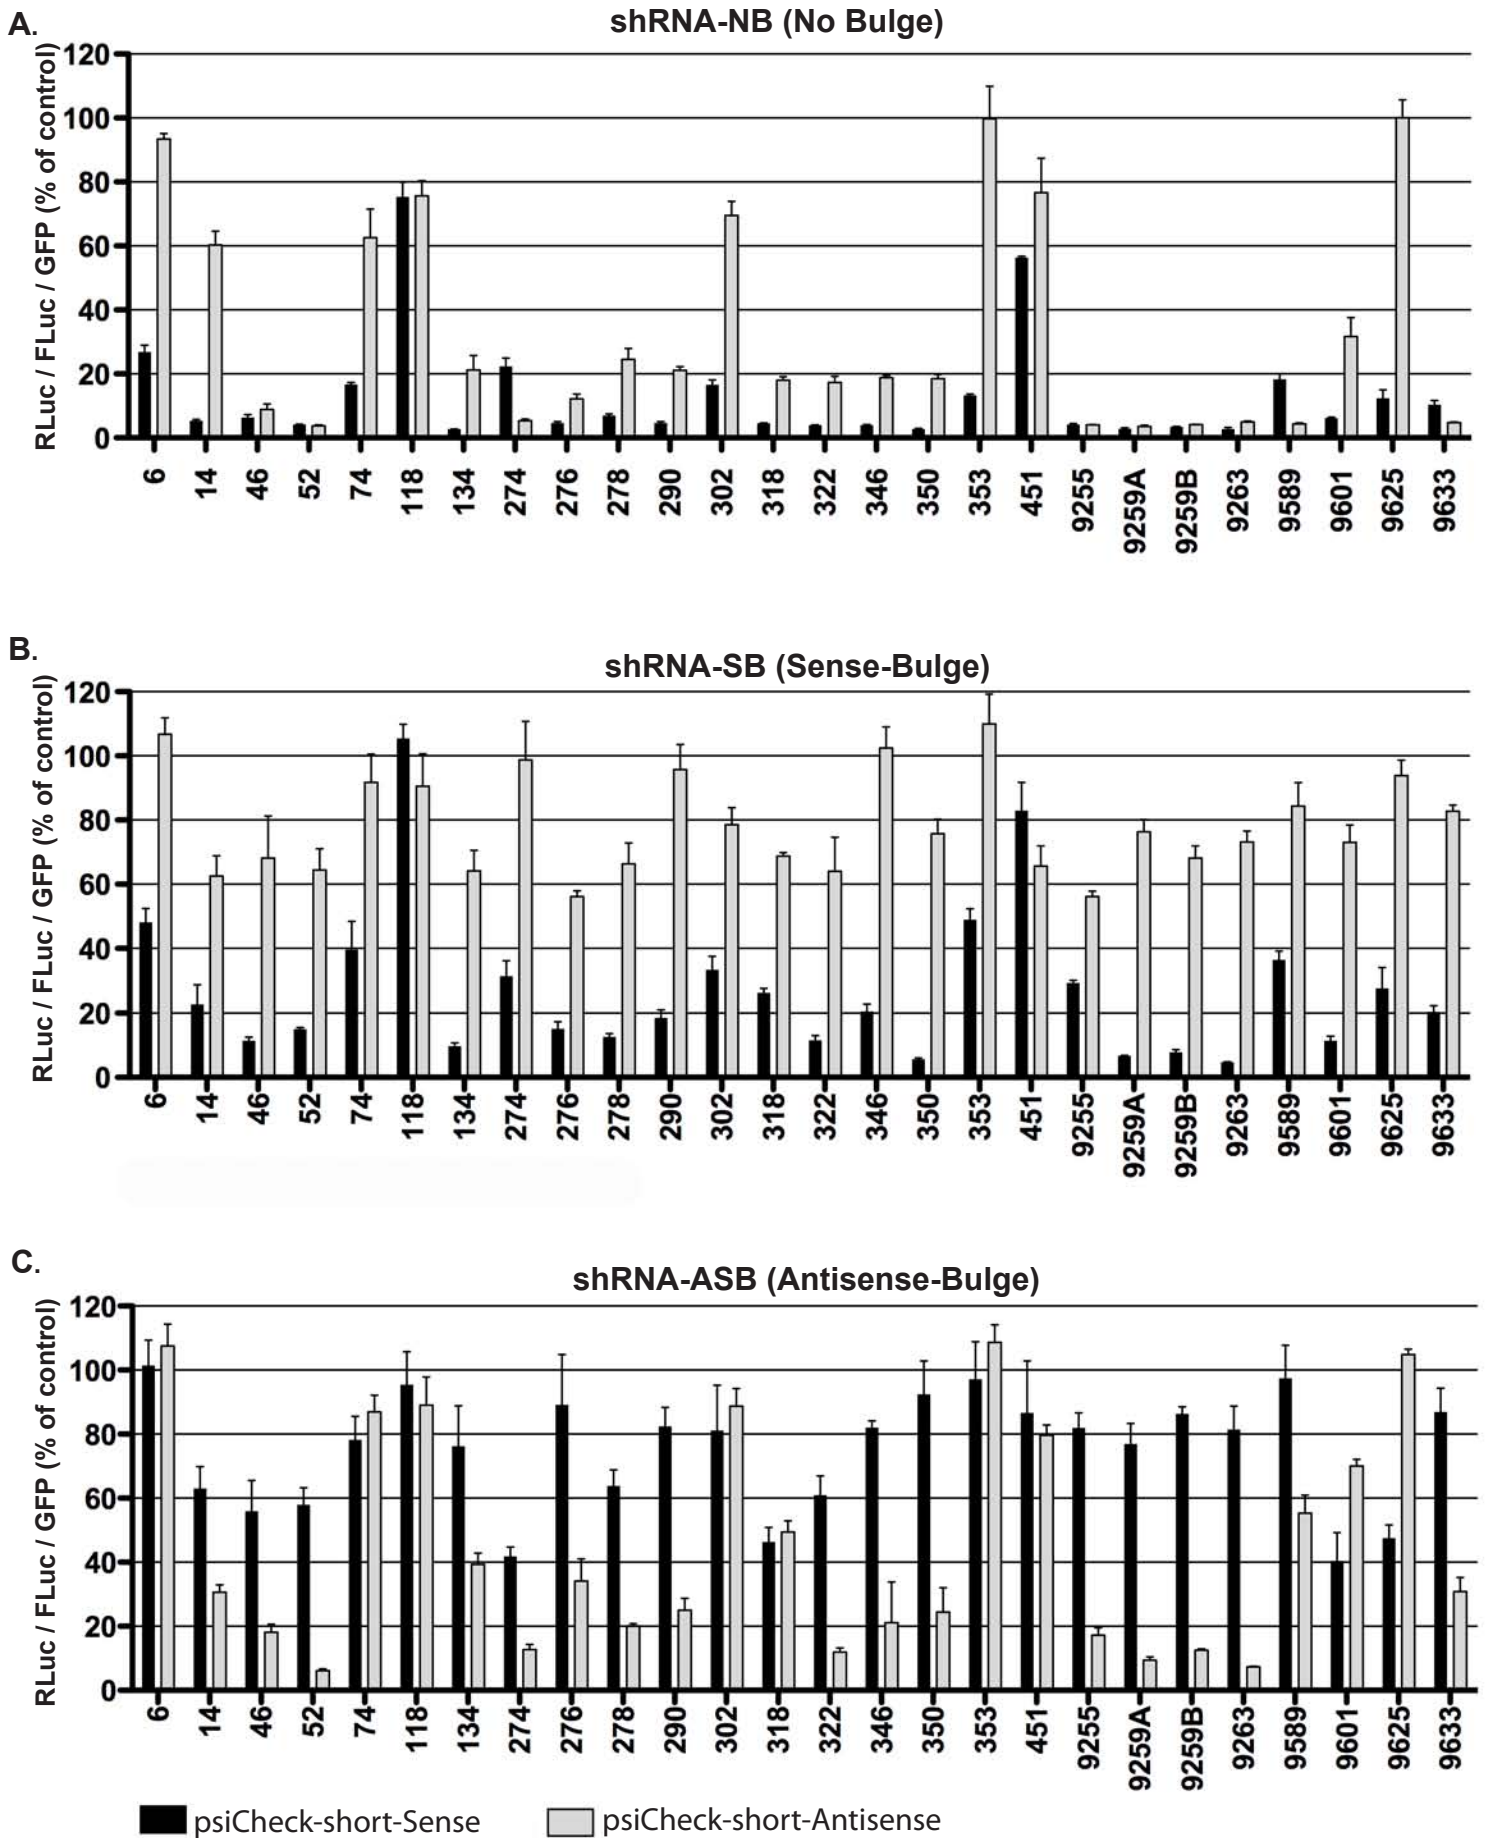

Supplementary Figure 2.

A.

FL-J6/JFH-Luc

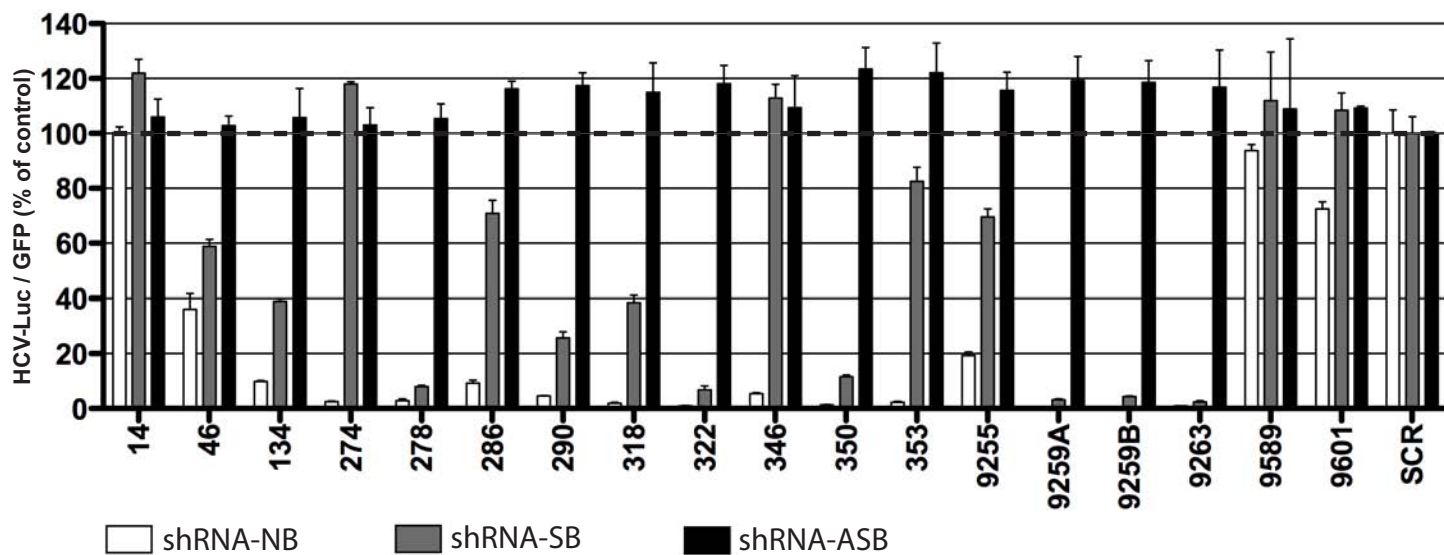

B.

HCVcc

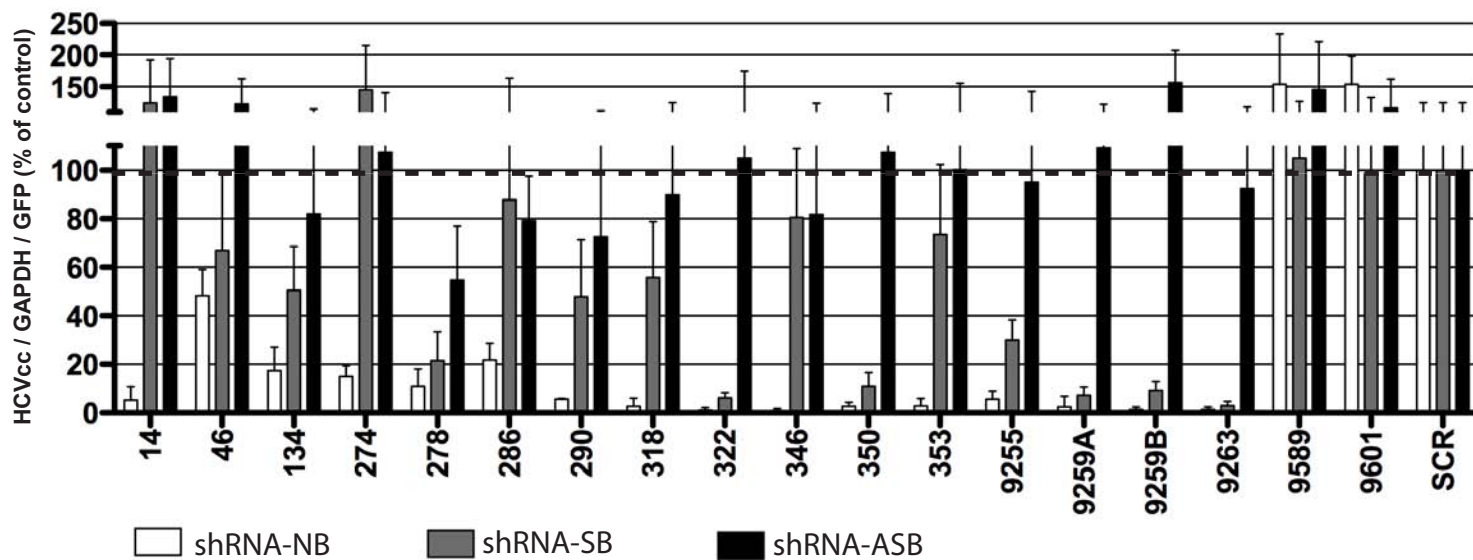

Supplementary Figure 3.

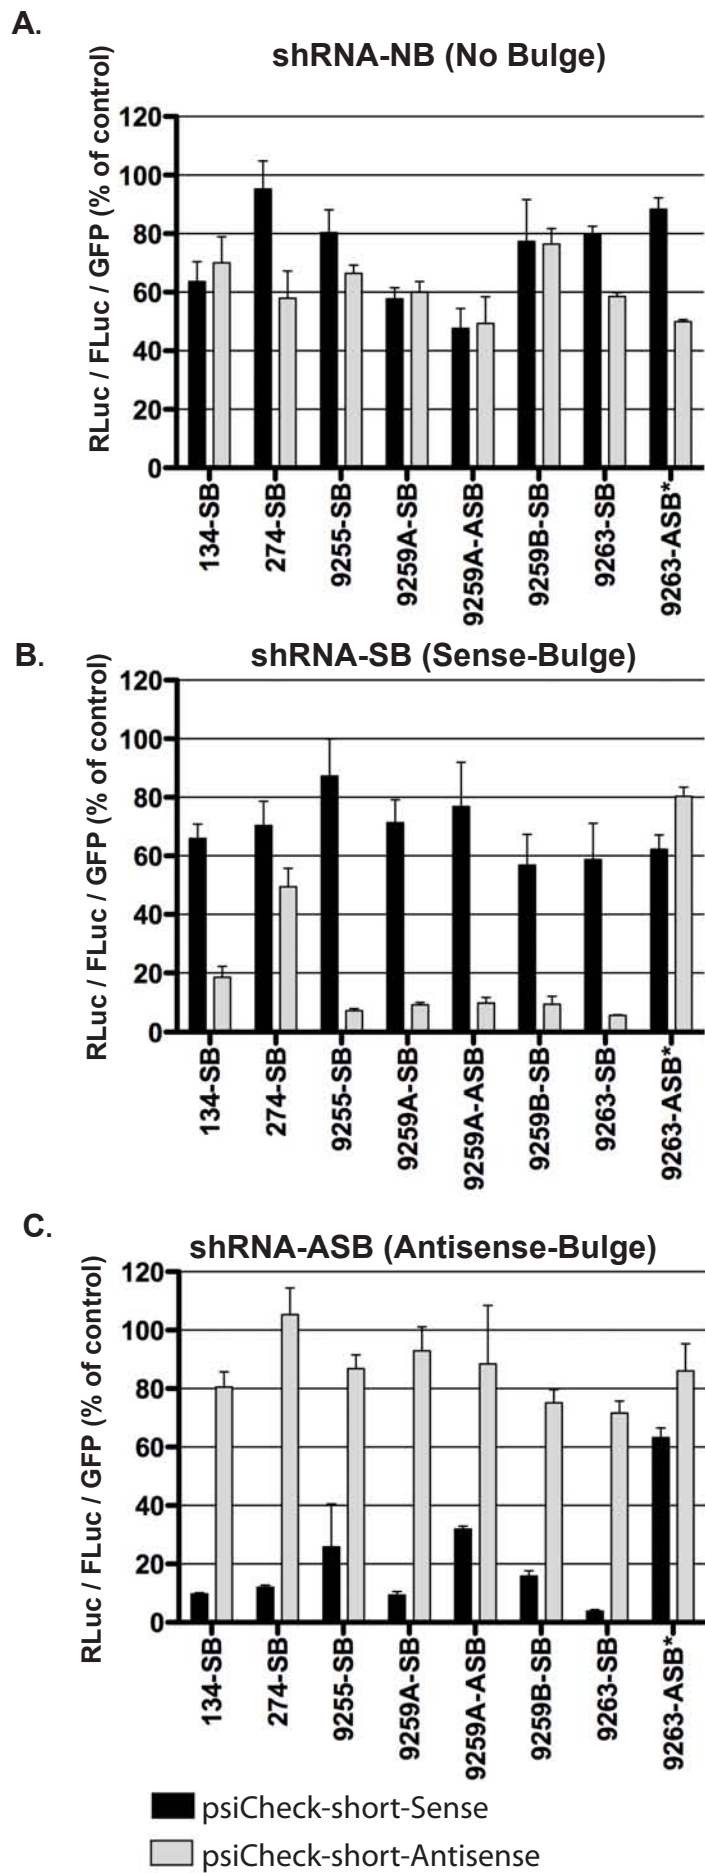

Supplementary Figure 4.

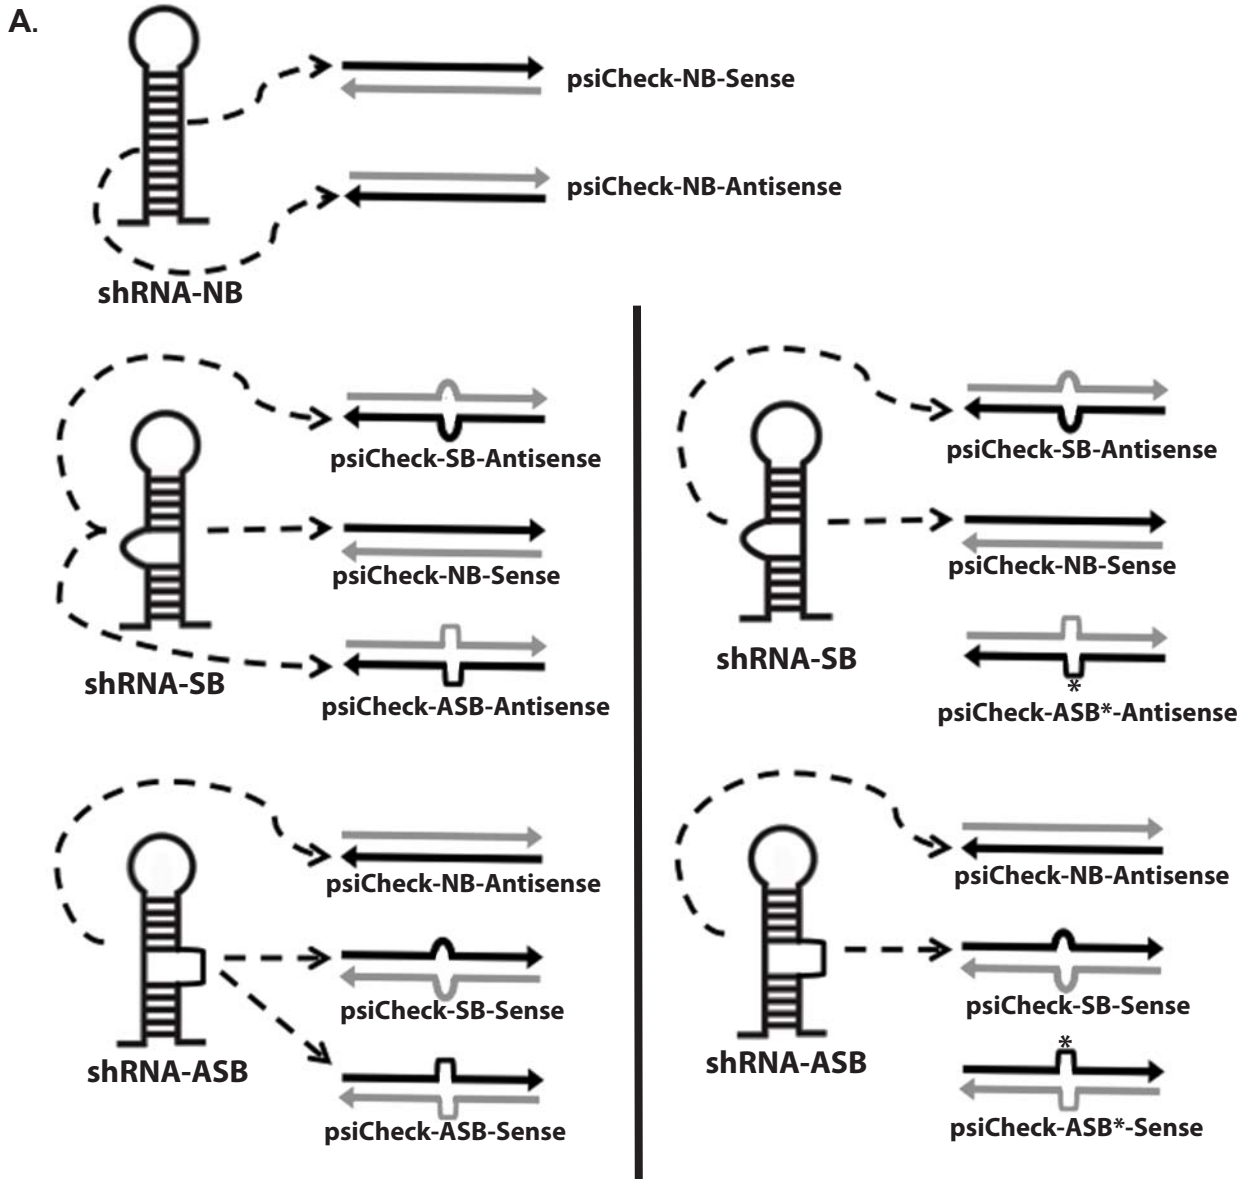

**B.**

| psiCheck-rescue templates           |           |                       |                        |
|-------------------------------------|-----------|-----------------------|------------------------|
| shRNA                               | Strand    | Target                |                        |
| shRNA-NB                            | Sense     | psiCheck-NB-Antisense |                        |
|                                     | Antisense | psiCheck-NB-Sense     |                        |
| shRNA-SB                            | Sense     | psiCheck-SB-Antisense | psiCheck-ASB-Antisense |
|                                     | Antisense | psiCheck-NB-Sense     |                        |
| shRNA-ASB                           | Sense     | psiCheck-NB-Antisense |                        |
|                                     | Antisense | psiCheck-SB-Sense     | psiCheck-ASB-Sense     |
| psiCheck-mutated rescue template(*) |           |                       |                        |
| shRNA                               | Strand    | Target                |                        |
| shRNA-NB                            | Sense     | psiCheck-NB-Antisense |                        |
|                                     | Antisense | psiCheck-NB-Sense     |                        |
| shRNA-SB                            | Sense     | psiCheck-SB-Antisense |                        |
|                                     | Antisense | psiCheck-NB-Sense     |                        |
| shRNA-ASB                           | Sense     | psiCheck-NB-Antisense |                        |
|                                     | Antisense | psiCheck-SB-Sense     |                        |

Supplementary Figure 5.

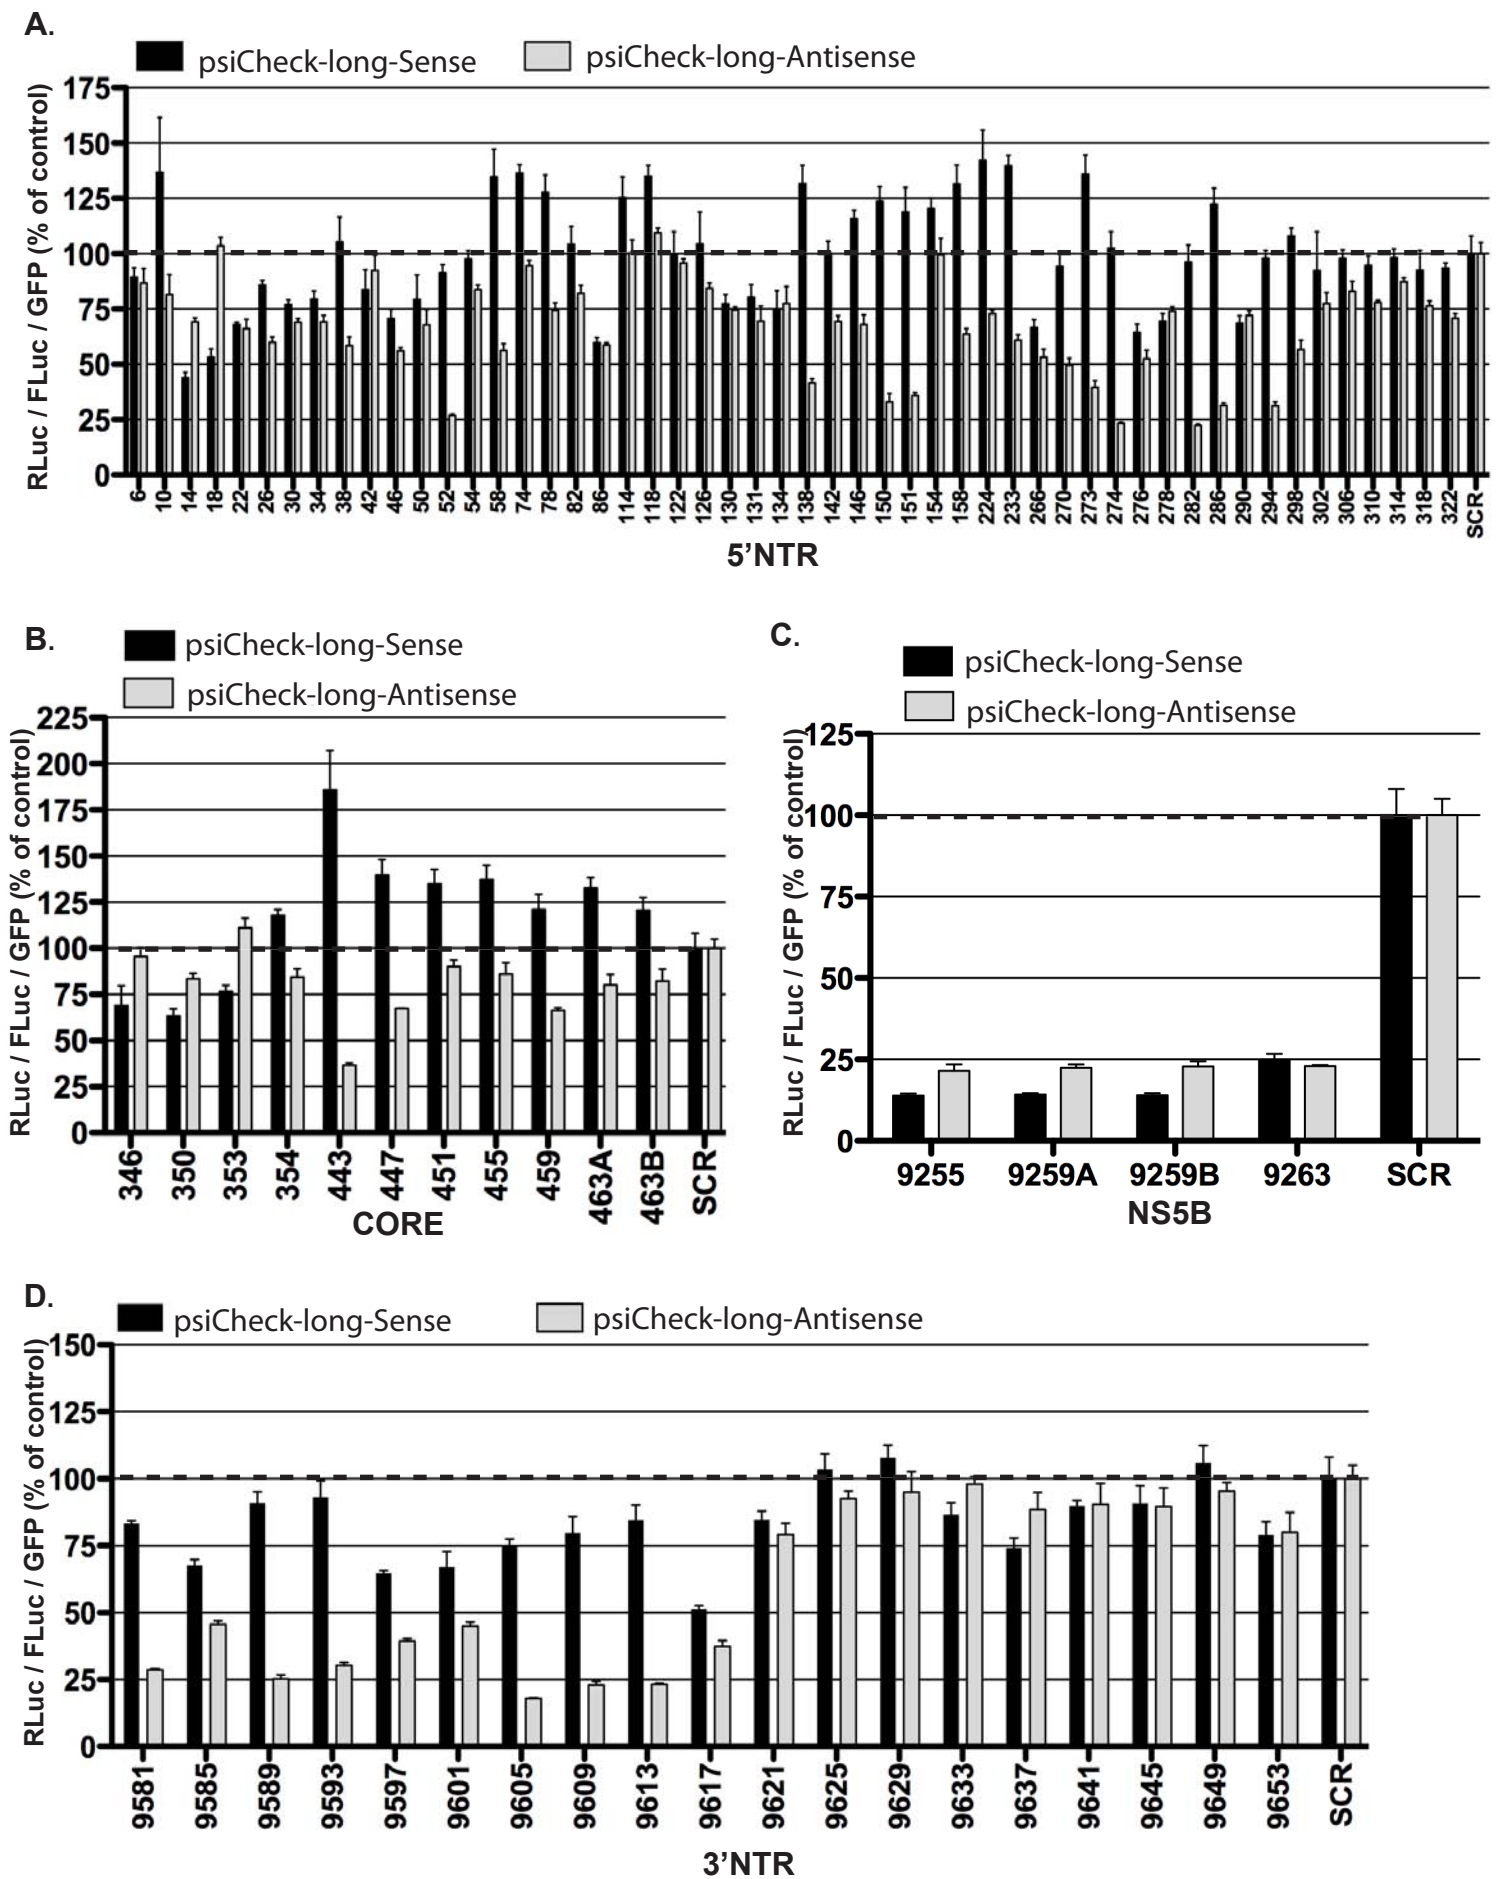

Supplementary Figure 6.

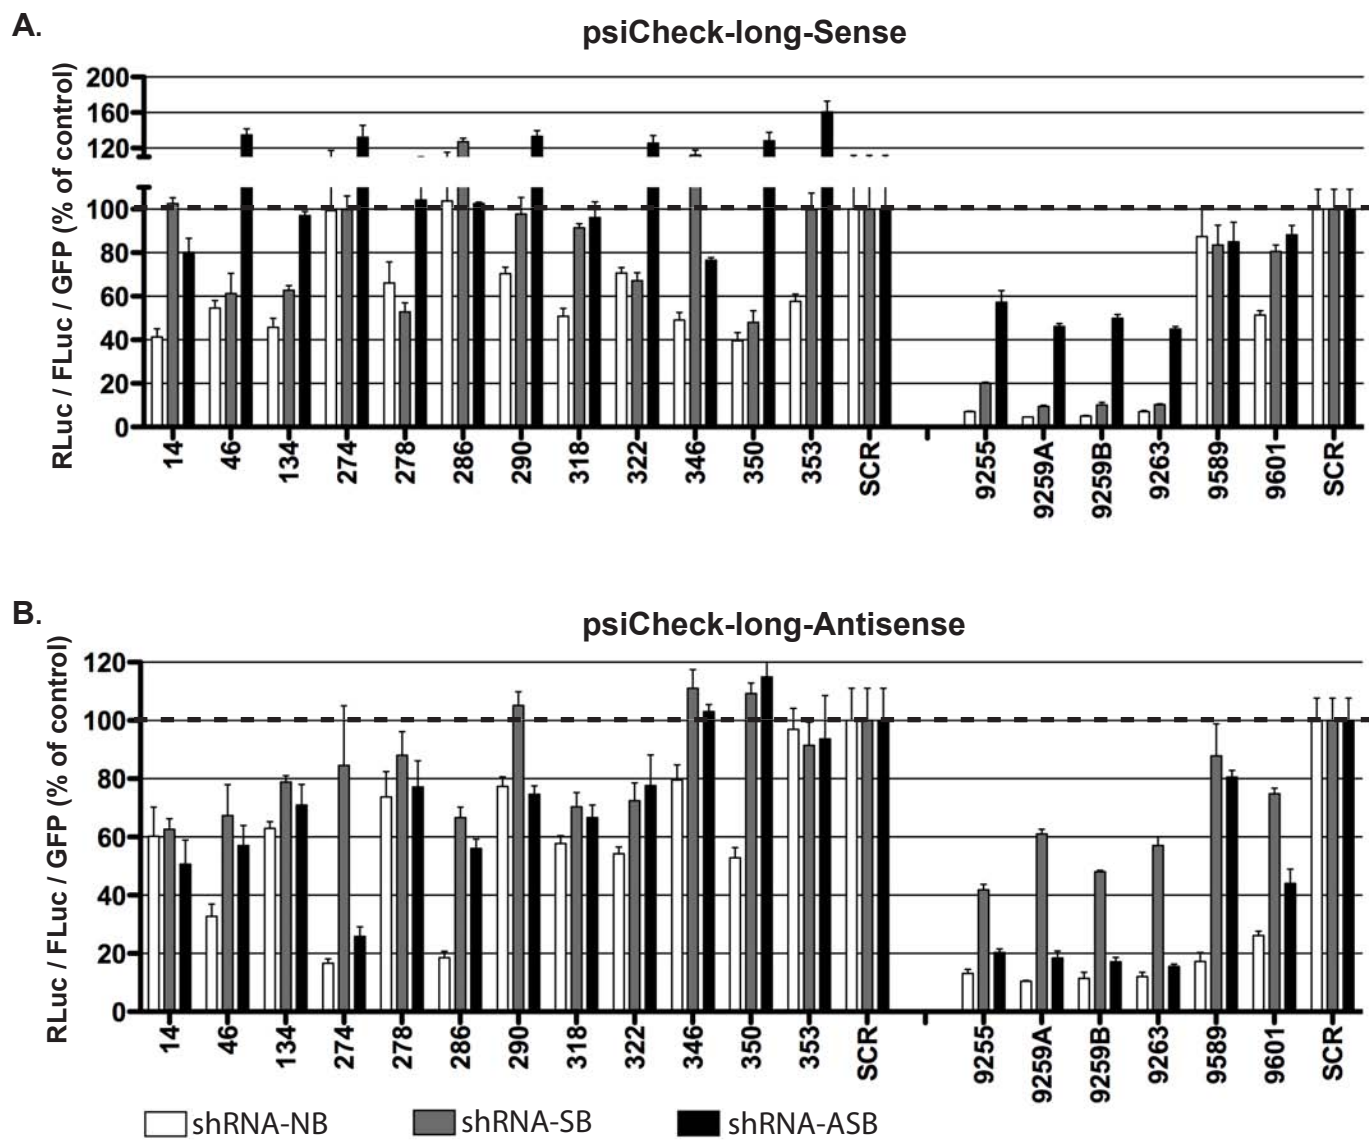

Supplementary Figure 7.

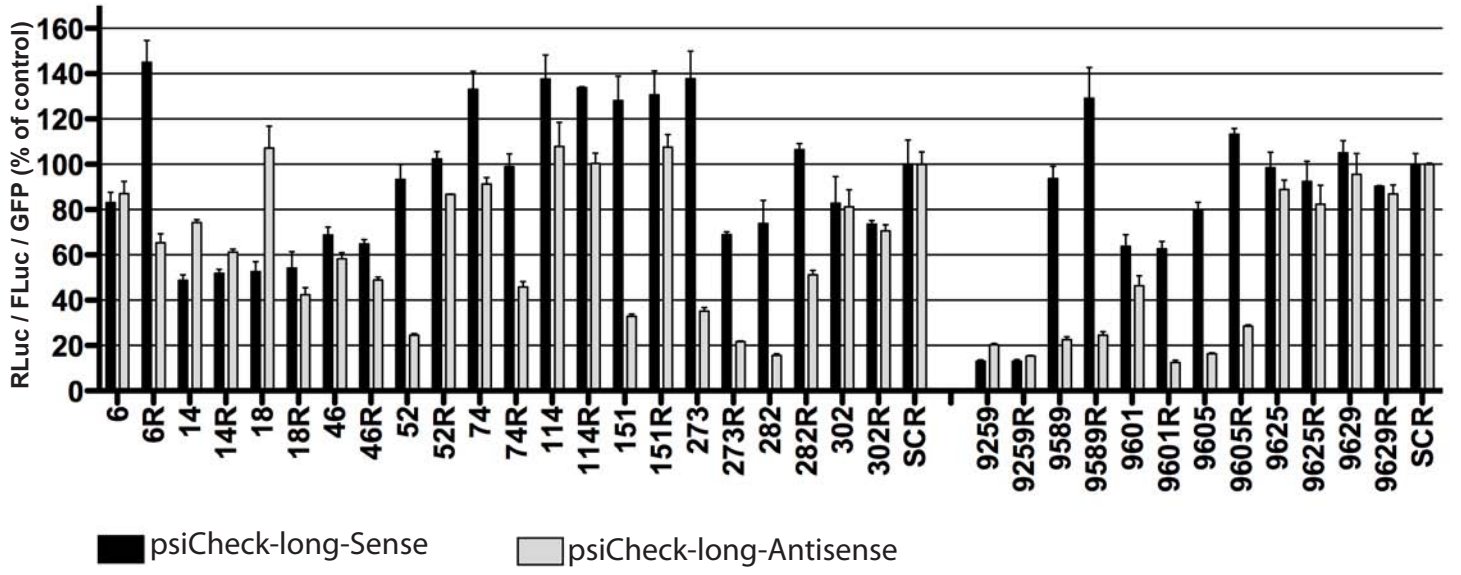

Supplementary Figure 8.



|  | Sense shRNA strand<br>No Bulge (NB) shRNA | Sense shRNA strand<br>Sense Bulge (SB) shRNA | Antisense shRNA strand<br>Antisense Bulge (ASB) shRNA | Sense shRNA strand<br>Reverse shRNA |
|--|-------------------------------------------|----------------------------------------------|-------------------------------------------------------|-------------------------------------|
|  | 6                                         | 5'-CCCCTAATAGGGGCGACACTCCGC-3'               | 5'-CCCCTAATTCGGGCGACACTCCGC-3'                        | 5'-GCGGAGTGTGCCCGGAATAGGGG-3'       |
|  | 10                                        | 5'-TAATAGGGGCGACACTCCGCATG-3'                |                                                       |                                     |
|  | 14                                        | 5'-AGGGGCGACACTCCGCATGAATC-3'                | 5'-AGGGGCGTGGTCTCCGCATGAATC-3'                        | 5'-GATTATGCGGGGACAACCTCGCCCT-3'     |
|  | 18                                        | 5'-GCGCACTCCGCATGAATCACTC-3'                 |                                                       | 5'-GAGTGATTCATGCGGAGTGTGCG-3'       |
|  | 22                                        | 5'-CACTCCGCATGAATCACTCCCT-3'                 |                                                       |                                     |
|  | 26                                        | 5'-CCGCCATGAATCACTCCCTGTGA-3'                |                                                       |                                     |
|  | 30                                        | 5'-CATGAATCACTCCCTGTGAGAA-3'                 |                                                       |                                     |
|  | 34                                        | 5'-AATCACTCCCTGTGAGAACTAC-3'                 |                                                       |                                     |
|  | 38                                        | 5'-ACTCCCTGTGAGAACTACTGTC-3'                 |                                                       |                                     |
|  | 42                                        | 5'-CCCTGTGAGAACTACTGCTTCA-3'                 |                                                       |                                     |
|  | 46                                        | 5'-GTGAGGAACTACTGTCTTACGCA-3'                | 5'-GTGAGGAAAGAATCTGTCTTACGCA-3'                       | 5'-TGCGTGAAGACAGATTCTTCTCAC-3'      |
|  | 50                                        | 5'-GGAAGTACTGTCTTACGCAAGAA-3'                |                                                       |                                     |
|  | 52                                        | 5'-AACTACTGTCTTACGCAAGAA-3'                  | 5'-AACTACTCAAGTTCACGCAAGAA-3'                         | 5'-TTCTGCGTGATCCTCAGTAGTT-3'        |
|  | 54                                        | 5'-CTACTGTCTTACGCAAGAAAGCGT-3'               |                                                       |                                     |
|  | 58                                        | 5'-TGTCTTACGCAAGAAAGCGTCTAG-3'               |                                                       |                                     |
|  | 74                                        | 5'-GCGTCTAGCCATGGCGTTAGTAGT-3'               | 5'-GCGCCTAGGGGTTGGCGTTAGTAGT-3'                       | 5'-CATACTAACGCCAACCCCTAGGCGC-3'     |
|  | 78                                        | 5'-CTAGCCATGGCGTTAGTAGAGTG-3'                |                                                       |                                     |
|  | 82                                        | 5'-CCATGGCGTTAGTAGAGTGTGCT-3'                |                                                       |                                     |
|  | 86                                        | 5'-GGCGTTAGTAGAGTGTGCTGACAG-3'               |                                                       |                                     |
|  | 114                                       | 5'-CAGGCCCCCTCCCGGGAGAGC-3'                  |                                                       | 5'-GCTCTCCCGGGAGGGGGGCGCTG-3'       |
|  | 118                                       | 5'-CCCCCTCCCGGGAGAGCCATA-3'                  | 5'-CCCCCGGAAGCCGGGAGAGCCATA-3'                        | 5'-TATGGCTCTCCCGCCTGGGGGGG-3'       |
|  | 122                                       | 5'-CCCCCTCCCGGGAGAGCCATAGTGG-3'              |                                                       |                                     |
|  | 126                                       | 5'-TCCCGGGAGAGCCATAGTGGTCTG-3'               |                                                       |                                     |
|  | 130                                       | 5'-GGGAGAGCCATAGTGGTCTGCGGA-3'               |                                                       |                                     |
|  | 131                                       | 5'-GGAGAGCCATAGTGGTCTGCGGAA-3'               |                                                       |                                     |
|  | 134                                       | 5'-GAGCCATAGTGGTCTGCGGAAACCG-3'              | 5'-GAGCCATACAACGTCTGCGGAAACCG-3'                      | 5'-CGGTTCCGAGACGTTGTATGGCTC-3'      |
|  | 138                                       | 5'-CATAGTGGTCTGCGGAAACCGGTA-3'               |                                                       |                                     |
|  | 142                                       | 5'-GTGGTCTGCGGAAACCGGTGAGTAC-3'              |                                                       |                                     |
|  | 146                                       | 5'-TCTGCGGAAACCGGTGAGTACACCG-3'              |                                                       |                                     |
|  | 150                                       | 5'-CGGAAACCGGTGAGTACACCGGAAT-3'              |                                                       |                                     |
|  | 151                                       | 5'-GGAACCGGTGAGTACACCGGAA-3'                 |                                                       | 5'-TTCCGGTGTACTACCGGTTCC-3'         |
|  | 154                                       | 5'-ACCGGTGAGTACACCGGAATTGCC-3'               |                                                       |                                     |
|  | 158                                       | 5'-GTGAGTACACCGGAATTGCCGGGA-3'               |                                                       |                                     |
|  | 224                                       | 5'-ATTTGGGCGTCCCCCGCAAGAC-3'                 |                                                       |                                     |
|  | 233                                       | 5'-TGCCCCCGCAAGACTGCTAGCCGAGTA-3'            |                                                       |                                     |
|  | 266                                       | 5'-GGTTGCAAAAGCCTTGTGGTACT-3'                |                                                       |                                     |
|  | 270                                       | 5'-GCGAAAGCCTTGTGGTACTGCT-3'                 |                                                       |                                     |
|  | 273                                       | 5'-AAAGCCTTGTGGTACTGCT-3'                    |                                                       | 5'-AGGCAGTACCACAAGCCTTT-3'          |
|  | 274                                       | 5'-AAGGCCTTGTGGTACTGCTGATA-3'                | 5'-AAGGCCTTCAACGTACTGCTGATA-3'                        | 5'-TATCAGGCAGTACGTTGAAGGCCTT-3'     |
|  | 276                                       | 5'-GGCCTTGTGGTACTGCTGATA-3'                  | 5'-GGCCTTGTCCCACTGCTGATA-3'                           | 5'-TATCAGGCAGTGTGGACAAGGC-3'        |
|  | 278                                       | 5'-CCTTGTGGTACTGCTGATAGGGT-3'                | 5'-CCTTGTGCAATCTGCTGATAGGGT-3'                        | 5'-ACCTTATCAGGCACAATCCACAAGG-3'     |
|  | 282                                       | 5'-GTGGTACTGCTGATAGGGTGTCT-3'                |                                                       |                                     |
|  | 286                                       | 5'-TACTGCTGATAGGGTGTCTGCGA-3'                | 5'-TACTGCCACTTAGGGTGTCTGCGA-3'                        | 5'-TCGCAAGCACCTTAAAGAGCAGTA-3'      |
|  | 290                                       | 5'-GCCTGATAGGGTGTCTGCGAGTGC-3'               | 5'-GCCTGATACCCCTGCTTGCAGTGC-3'                        | 5'-GCACTCGCAAGCAGGGGTATCAGGC-3'     |
|  | 294                                       | 5'-GATAGGGTGTCTGCGAGTGCCTCG-3'               |                                                       |                                     |
|  | 298                                       | 5'-GGGTGCTTGCAGTGCCTCGGGAG-3'                |                                                       |                                     |
|  | 302                                       | 5'-GCTTGCAGTGCCTCGGGAGTGTCT-3'               | 5'-GCTTGCAGAACCCCGGGAGTGTCT-3'                        | 5'-AGACCTCCCGGGGTTGTCGCAAGC-3'      |
|  | 306                                       | 5'-GCGAGTGCCTCGGGAGGTCTGTA-3'                |                                                       |                                     |
|  | 310                                       | 5'-GTGCCCGGGAGGTCTCGTAGACC-3'                |                                                       |                                     |
|  | 314                                       | 5'-CCCGGAGGTCTCGTAGACCCTGC-3'                |                                                       |                                     |
|  | 318                                       | 5'-GGAGTCTGCAAGACCGTGACCA-3'                 | 5'-GGAGTCTGCCAAGACCGTGACCA-3'                         | 5'-TGGTGCAGCGTCTTGGCAGACTCC-3'      |
|  | 322                                       | 5'-GTCTGTGACCGTGCACCATGAG-3'                 | 5'-GTCTGTACTTGTGCTGCACCATGAG-3'                       | 5'-CTCATGGTGCACGCAAGTACGAGAC-3'     |
|  | 346                                       | 5'-CACAAATCCTAAACCTCAAAGAAA-3'               | 5'-CACAAATGGGAAAACCTCAAAGAAA-3'                       | 5'-TTTCTTGTAGGTTATTCGATTTGTG-3'     |
|  | 350                                       | 5'-AATCCTAAACCTCAAAGAAAACCC-3'               | 5'-AATCCTAATGGGTCAAAGAAAACCC-3'                       | 5'-GGTTTTTCTTTGACCCATTAGGATT-3'     |
|  | 353                                       | 5'-CCTAAACCTCAAAGAAAACCAA-3'                 | 5'-CCTAAACGAAGAAAAGAAAACCAA-3'                        | 5'-TTGGTTTTTCTTACTGTTTAGG-3'        |
|  | 354                                       | 5'-CTAAACCTCAAAGAAAACCAA-3'                  |                                                       |                                     |
|  | 443                                       | 5'-TACTTGTTCGCGCAGGGGCC-3'                   |                                                       |                                     |
|  | 447                                       | 5'-TGTTCGCGCAGGGGCCAGGT-3'                   |                                                       |                                     |
|  | 451                                       | 5'-GCCGCGCAGGGGCCAGGTTGGG-3'                 | 5'-GCCGCGCACCCCGCCAGGTTGGG-3'                         | 5'-CCCAACTGGGGCGGGTGCAGGCG-3'       |
|  | 455                                       | 5'-CGCAGGGGCCAGGTTGGGTGTG-3'                 |                                                       |                                     |
|  | 459                                       | 5'-GGGGCCAGGTTGGGTGTGCGCG-3'                 |                                                       |                                     |
|  | 463A                                      | 5'-CCCCAGGTTGGGTGTGCGCGGAC-3'                |                                                       |                                     |
|  | 463B                                      | 5'-CCCCAGGTTGGGTGTGCGCGCA-3'                 |                                                       |                                     |
|  | 9255                                      | 5'-TGAAGACCAAGCTCAACTCACTC-3'                | 5'-TGAAGACGTTGTCTCAACTCACTC-3'                        | 5'-GAGTGAGTTTGAAGAAAGTCTTCA-3'      |
|  | 9259A                                     | 5'-GACCAAGCTCAAACCTCACTCCA-3'                | 5'-GACCAAGCAGGTAACCTCACTCCA-3'                        | 5'-TGGAGTGAGTTACTGCTTGGTC-3'        |
|  | 9259B                                     | 5'-GACCAAGCTCAAACCTCACTCATT-3'               | 5'-GACCAAGCAGGTAACCTCACTCATT-3'                       | 5'-AATGGAGTGAGTTACTGCTTGGTC-3'      |
|  | 9263                                      | 5'-AAGCTCAAACCTCACTTCCCG-3'                  | 5'-AAGCTCAATGGACTCACTTCCCG-3'                         | 5'-CGGCAATGGAGTGACCTTGGACTT-3'      |
|  | 9581                                      | 5'-GGTGGCTCCATCTTAGCCCTAGTC-3'               |                                                       |                                     |
|  | 9585                                      | 5'-GCTCCATCTTAGCCCTAGTCACGG-3'               |                                                       |                                     |
|  | 9589                                      | 5'-CATCTTAGCCCTAGTCACGGCTAG-3'               | 5'-CATCTTAGCCCTAGTCACGGCTAG-3'                        | 5'-CTAGCCGTGACTACCCCTAAGATG-3'      |
|  | 9593                                      | 5'-TTAGCCCTAGTCACGGCTAGTGT-3'                |                                                       |                                     |
|  | 9597                                      | 5'-CCTAGTACAGGCTAGCTGTGAAA-3'                |                                                       |                                     |
|  | 9601                                      | 5'-AGTACAGGCTAGCTGTGAAAGTGC-3'               | 5'-AGTACAGGCTAGCTGTGAAAGTGC-3'                        | 5'-GACCTTTCACAGCATTCCCGTACT-3'      |
|  | 9605                                      | 5'-ACGGCTAGCTGTGAAAGTCCGTG-3'                |                                                       | 5'-CACGGACCTTTCACAGTACGCGT-3'       |
|  | 9609                                      | 5'-CTAGCTGTGAAAGTCCGTGAGCC-3'                |                                                       |                                     |
|  | 9613                                      | 5'-CTGTGAAAGTCCGTGAGCCGAT-3'                 |                                                       |                                     |
|  | 9617                                      | 5'-GAAAGTCCGTGAGCCGATGACT-3'                 |                                                       |                                     |
|  | 9621                                      | 5'-GGTCCGTGAGCCGATGACTGCA-3'                 |                                                       |                                     |
|  | 9625                                      | 5'-CGTAGCCGCTAGCTGCAGAGAG-3'                 | 5'-CGTAGCCGCTAGCTGCAGAGAG-3'                          | 5'-CTCTCTGCAGTCAACCGGCTCAGC-3'      |
|  | 9629                                      | 5'-AGCCGCTAGCTGCAGAGAGTGC-3'                 |                                                       | 5'-GGCACTCTCTGCAGTCAACCGGCT-3'      |
|  | 9633                                      | 5'-GCATGACTGCAGAGAGTCCGTA-3'                 | 5'-GCATGACTCCGTGAGAGTCCGTA-3'                         | 5'-TTACGGCACTCTCACCGAGTCACTG-3'     |
|  | 9637                                      | 5'-GACTGCAGAGAGTCCGTAACCTG-3'                |                                                       |                                     |
|  | 9641                                      | 5'-GCAGAGAGTCCGTAACCTGCTC-3'                 |                                                       |                                     |
|  | 9645                                      | 5'-AGAGTCCGTAACCTGCTCCTGCA-3'                |                                                       |                                     |
|  | 9649                                      | 5'-TGCCGTAACCTGCTCCTGCA-3'                   |                                                       |                                     |
|  | 9653                                      | 5'-GTAAGTCTCTCTGCAGATCAT-3'                  |                                                       |                                     |

Supplementary Table 1.

|       | HCV target sequence                              | delta-G |         |
|-------|--------------------------------------------------|---------|---------|
|       |                                                  | Forward | Reverse |
|       | 5'NTR-CORE (nt 1- 547 in GenBank: JF343782.1)    | -221.8  | -225.1  |
|       | NS5B-3'NTR (nt 9185-9679 in GenBank: JF343782.1) | -177.6  | -168    |
| 6     | 5'-CCCCTAATAGGGGCGACACTCCGC-3'                   | -8      | -8.9    |
| 10    | 5'-TAATAGGGGCGACACTCCGCCATG-3'                   | -6.9    | -6.1    |
| 14    | 5'-AGGGGCGACACTCCGCCATGAATC-3'                   | -6.9    | -6.1    |
| 18    | 5'-GCGACACTCCGCCATGAATCACTC-3'                   | -2.7    | -2.5    |
| 22    | 5'-CACTCCGCCATGAATCACTCCCT-3'                    | NA      | -1.5    |
| 26    | 5'-CCGCCATGAATCACTCCCTGTGA-3'                    | -3.2    | -2.9    |
| 30    | 5'-CATGAATCACTCCCTGTGAGGAA-3'                    | -3.7    | -4.6    |
| 34    | 5'-AATCACTCCCTGTGAGGAACTAC-3'                    | -3.7    | -4.8    |
| 38    | 5'-ACTCCCTGTGAGGAACTACTGTC-3'                    | -1.5    | -4.6    |
| 42    | 5'-CCCTGTGAGGAACTACTGTCTCA-3'                    | -4.6    | -1      |
| 46    | 5'-GTGAGGAACTACTGTCTCACGCA-3'                    | -8.8    | -2.9    |
| 50    | 5'-GGAAGCTACTGTCTCACGAGAAA-3'                    | -2.5    | -3      |
| 52    | 5'-AACTACTGTCTCACGAGAAA-3'                       | -2.5    | -3      |
| 54    | 5'-CTACTGTCTCACGAGAAAAGCGT-3'                    | -3.6    | -4.6    |
| 58    | 5'-TGCTTACAGCAGAAAAGCGTCTAG-3'                   | -4.1    | -6.4    |
| 74    | 5'-GCGTCTAGCCATGGCGTTAGTATG-3'                   | -4.6    | -0.2    |
| 78    | 5'-CTAGCCATGGCGTTAGTATGAGTG-3'                   | -2.8    | -0.2    |
| 82    | 5'-CCATGGCGTTAGTATGAGTTCGT-3'                    | -2.4    | NA      |
| 86    | 5'-GGCGTTAGTATGAGTTCGTACAG-3'                    | -4.5    | NA      |
| 114   | 5'-CAGGCCCCCCTCCCGGGAGAGC-3'                     | -3.9    | -14.7   |
| 118   | 5'-CCCCCCTCCCGGGAGAGCCATA-3'                     | -3.9    | -11.9   |
| 122   | 5'-CCCCCCTCCCGGGAGAGCCATAGGG-3'                  | -3.9    | -6.4    |
| 126   | 5'-TCCCGGGAGAGCCATAGTGGTCTG-3'                   | -3.1    | -2.5    |
| 130   | 5'-GGGAGAGCCATAGTGGTCTGCGGA-3'                   | -3.2    | -2.5    |
| 131   | 5'-GGAGAGCCATAGTGGTCTGCGGAA-3'                   | -3.2    | -2.5    |
| 134   | 5'-GAGCCATAGTGGTCTGCGGAAACG-3'                   | -3.4    | -3      |
| 138   | 5'-CATAGTGGTCTGCGGAAACCGGTGA-3'                  | -5.1    | -3      |
| 142   | 5'-GTGGTCTGCGGAAACCGGTGATAC-3'                   | -3.8    | -3      |
| 146   | 5'-TCTGCGGAAACCGGTGATACACCG-3'                   | -8.8    | -7.3    |
| 150   | 5'-CGGAAACCGGTGATACACCGAAT-3'                    | -9.9    | -10     |
| 151   | 5'-GGAACCGGTGATACACCGGAA-3'                      | -9.9    | -10     |
| 154   | 5'-ACCGGTGATACACCGAATTCGC-3'                     | -9.9    | -10     |
| 158   | 5'-GTGAGTACACCGAATTCGCGGGA-3'                    | -6.2    | -4.8    |
| 224   | 5'-ATTTGGCGTCCCGCCGCAAGAC-3'                     | -3.6    | -5.1    |
| 233   | 5'-TGCCCCGCAAGACTGCTAGCCGAGTA-3'                 | -1.8    | -5.8    |
| 266   | 5'-GGTTGCGAAAGCCTTGTGGTACT-3'                    | -3      | -0.5    |
| 270   | 5'-GCGAAAGCCTTGTGGTACTGCCT-3'                    | -4.1    | -3.2    |
| 273   | 5'-AAAGCCTTGTGGTACTGCCT-3'                       | -2.9    | -3.2    |
| 274   | 5'-AAGCCTTGTGGTACTGCCTGATA-3'                    | -3.6    | -3.7    |
| 276   | 5'-GGCCTTGTGGTACTGCCTGATA-3'                     | -2.9    | -1.7    |
| 278   | 5'-CCTTGTGGTACTGCCTGATAGGGT-3'                   | -5.6    | -1      |
| 282   | 5'-GTGGTACTGCCTGATAGGGTCTT-3'                    | -4.6    | -1.4    |
| 286   | 5'-TACTGCCTGATAGGGTCTTGCAG-3'                    | -3.5    | -1.4    |
| 290   | 5'-GCCTGATAGGGTCTTGCAGTGC-3'                     | -4.2    | -1.6    |
| 294   | 5'-GATAGGGTCTTGCAGTGCCTGC-3'                     | -9      | -6.9    |
| 298   | 5'-GGGTCTTGCAGTGCCTGCAGG-3'                      | -8.8    | -5.8    |
| 302   | 5'-GCTTGCAGTGCCTGCAGGAGTCT-3'                    | -4.1    | -2.3    |
| 306   | 5'-GCGAGTGCCTGCAGGAGTCTCGTA-3'                   | -8.7    | -5.7    |
| 310   | 5'-GTGCCCCGGGAGGTCTCGTAGACC-3'                   | -5.5    | -5.3    |
| 314   | 5'-CCCCGGGAGGTCTCGTAGACCGTGC-3'                  | -5.8    | -5.5    |
| 318   | 5'-GGAGGTCTCGTAGACCGTGCACCA-3'                   | -5.8    | -5.5    |
| 322   | 5'-GTCTCTGAGACCGTGCACCATGAG-3'                   | -3.6    | -3.6    |
| 346   | 5'-CACAACTCTAAACCTCAAAGAAA-3'                    | NA      | -0.8    |
| 350   | 5'-AATCCTAAACCTCAAAGAAAACC-3'                    | NA      | -0.8    |
| 353   | 5'-CCTAAACCTCAAAGAAAACCAA-3'                     | NA      | NA      |
| 354   | 5'-CTAAACCTCAAAGAAAACAAAA-3'                     | NA      | NA      |
| 443   | 5'-TACTTGTTCGCGCAGGGGCC-3'                       | -3.9    | -3.5    |
| 447   | 5'-TGTTGCCGCGCAGGGGCCCAGGT-3'                    | -3.9    | -5.1    |
| 451   | 5'-GCCGCGCAGGGGCCCAGGTTGGG-3'                    | -9.2    | -7.9    |
| 455   | 5'-GCGAGGGGCCCAGGTTGGGTGTG-3'                    | -5.3    | -4.7    |
| 459   | 5'-GGGGCCCCAGGTTGGGTGTGCGCG-3'                   | -5.1    | -4.4    |
| 463A  | 5'-CCCCAGGTTGGGTGTGCGCGCGAC-3'                   | -4.3    | -4.4    |
| 463B  | 5'-CCCCAGGTTGGGTGTGCGCGCGA-3'                    | -3.8    | -4.4    |
| 9255  | 5'-TGAAGACCAAGCTCAAACCTCACTC-3'                  | NA      | -4.5    |
| 9259A | 5'-GACCAAGCTCAAACCTCACTCCA-3'                    | NA      | -3.6    |
| 9259B | 5'-GACCAAGCTCAAACCTCACTCCATT-3'                  | NA      | -3.6    |
| 9263  | 5'-AAGCTCAAACCTCACTCCATTGCCG-3'                  | NA      | -1.2    |
| 9581  | 5'-GGTGGCTCCATCTTAGCCCTAGTC-3'                   | -4.6    | -5      |
| 9585  | 5'-GCTCCATCTTAGCCCTAGTCACGG-3'                   | -1.5    | -2.9    |
| 9589  | 5'-CATCTTAGCCCTAGTCACGGCTAG-3'                   | -6.2    | -7.5    |
| 9593  | 5'-TTAGCCCTAGTCACGGCTAGTGT-3'                    | -6.3    | -7.5    |
| 9597  | 5'-CCTAGTCACGGCTAGCTGTGAAA-3'                    | -6      | -2.9    |
| 9601  | 5'-AGTCACGGCTAGCTGTGAAAGGTC-3'                   | -6      | -2.9    |
| 9605  | 5'-ACGGCTAGCTGTGAAAGGTCCTG-3'                    | -4.5    | -2.1    |
| 9609  | 5'-CTAGCTGTGAAAGGTCCTGAGCC-3'                    | -1.1    | -1.7    |
| 9613  | 5'-CTGTGAAAGGTCCTGAGCCGAT-3'                     | -2.3    | -0.6    |
| 9617  | 5'-GAAAGGTCCTGAGCCGATGACT-3'                     | -4.5    | -1.6    |
| 9621  | 5'-GGTCCGTGAGCCGATGACTGCAG-3'                    | -4.9    | -5      |
| 9625  | 5'-CGTGAGCCGATGACTGCAGAGAG-3'                    | -1.9    | -5.1    |
| 9629  | 5'-AGCCGATGACTGCAGAGAGTGC-3'                     | -4.8    | -5.1    |
| 9633  | 5'-GCATGACTGCAGAGAGTGCCTGAA-3'                   | -4.5    | -1.7    |
| 9637  | 5'-GACTGCAGAGAGTGCCTAACTGG-3'                    | -3.2    | -1.7    |
| 9641  | 5'-GCAGAGAGTGCCTAACTGGTCTC-3'                    | -4.3    | -3.8    |
| 9645  | 5'-AGAGTGCCTAACTGGTCTCTCTG-3'                    | -6.5    | -3.6    |
| 9649  | 5'-TGCCGTAAGTGGTCTCTGCAGA-3'                     | -2.9    | -1.7    |
| 9653  | 5'-GTAAGTGGTCTCTGCAGATCAT-3'                     | -4.5    | -1.8    |

Supplementary Table 2
